# Supplementary material for: Effect of manganese oxide with its discrete valencies on Fe 2 O 3 /C to form (MnO x –Fe 2 O 3 /C) hybrid nanocomposite electrodes for enhanced ORR activity
Source: Royal Society of Chemistry journal article supplement (doi:10.1039/d5nj04763c), 2026-01-01
Supplement: d5nj04763c1.pdf [file d5nj04763c1.pdf]

## Supporting information

### **Effect of Manganese oxide with its discrete valencies on Fe<sub>2</sub>O<sub>3</sub>/C to form (MnO<sub>x</sub>-Fe<sub>2</sub>O<sub>3</sub>/C) hybrid nanocomposite electrodes for enhanced ORR activity**

Muhammad Faiz Irfan<sup>a</sup>, Sumia Akram<sup>b</sup>, Saba Ibrahim<sup>a</sup>, Rabia Naeem<sup>\*a</sup>, Maria Shafique<sup>a</sup>,  
Muhammad Salman Muhsan<sup>a</sup>, Aqib Hussain<sup>a</sup>, Tehmeena Ishaq<sup>c\*\*</sup>

<sup>a</sup>Department of Chemistry, Government College (GC) University, Lahore-54000, Pakistan

<sup>b</sup>Division of Science and Technology, University of Education, Lahore- 54590, Pakistan

<sup>c</sup>Department of Chemistry, University of Lahore (UOL), Sargodha Campus, Sargodha-37000, Pakistan

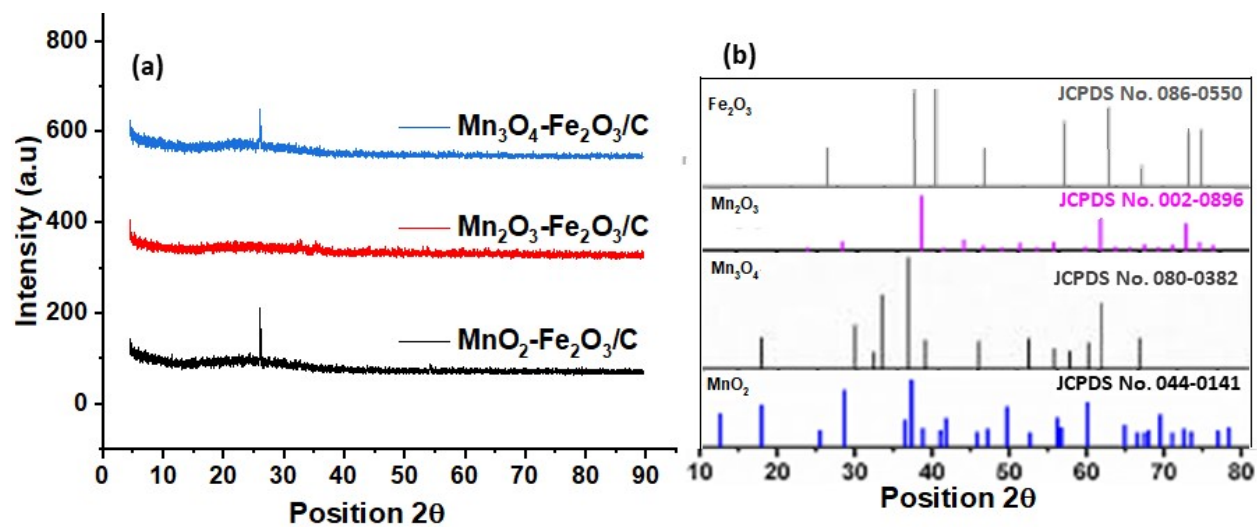

**Figure S1:** (a) XRD pattern of all ternary nanocomposites post-ORR (b) sticky pattern of  $\text{Fe}_2\text{O}_3$ ,  $\text{Mn}_2\text{O}_3$ ,  $\text{Mn}_3\text{O}_4$  and  $\text{MnO}_2$ .

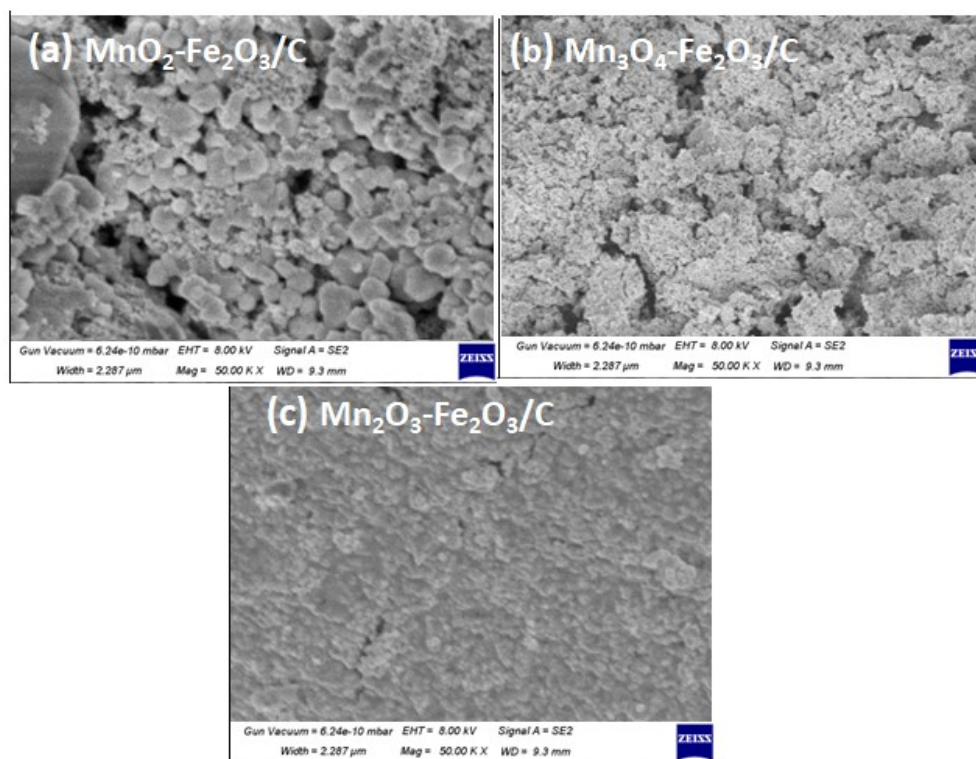

**Figure S2:** SEM images of (a)  $\text{MnO}_2\text{-Fe}_2\text{O}_3/\text{C}$ , (b)  $\text{Mn}_2\text{O}_3\text{-Fe}_2\text{O}_3/\text{C}$ , and (c)  $\text{Mn}_3\text{O}_4\text{-Fe}_2\text{O}_3/\text{C}$  nanocomposites post-ORR studies

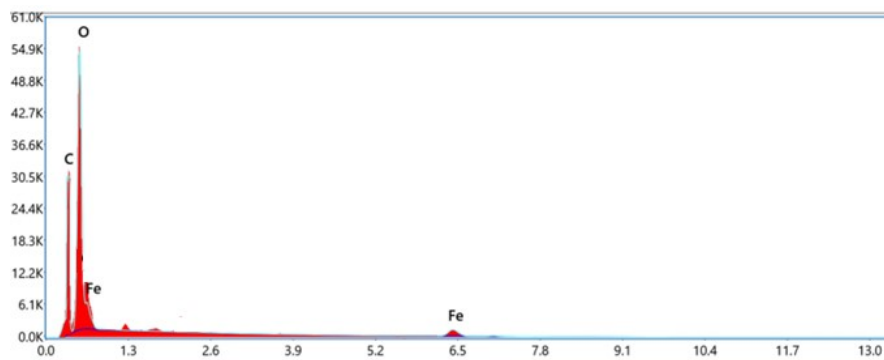

**Figure S3:** EDX spectra of  $\text{Fe}_2\text{O}_3/\text{C}$

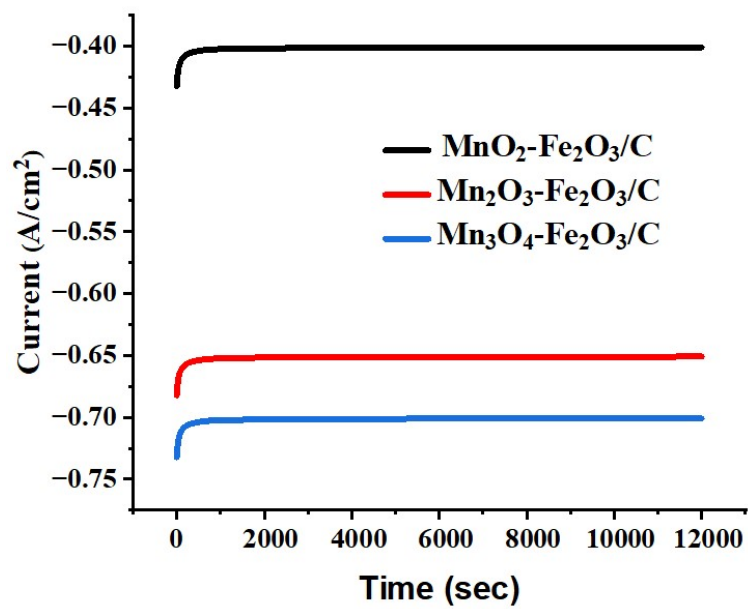

**Figure S4:** Chronoamperometry (i-t) plot of all ternary nanocomposites
